# Supplementary material for: Maternal and neonatal data collection systems in low- and middle-income countries for maternal vaccines active safety surveillance systems: A scoping review
Source: BMC Pregnancy Childbirth. 2021 Mar 17;21:217. doi: 10.1186/s12884-021-03686-9 (PMC7968860; doi:10.1186/s12884-021-03686-9)
Supplement: Supplementary file 3 — Additional file 3:. Data collection systems excluded. It contains the description of the excluded data collection systems. [file 12884_2021_3686_MOESM3_ESM.xlsx]

## Sheet: Sheet2
Row Labels	Count of INCLUDED/ EXCLUDED
Does not continuously collect perinatal outcomes at individual-level during all periods (antenatal care, delivery care, childbirth, and neonatal periods)	44
Has no baseline data captures from the last 5 years	6
No available information on the system	21
Not currently capturing data	9
Not from LMICs	1
Not MNCH system	3
Paper only	1
(blank)	11
Grand Total	96
Reason	Number
Does not continuously collect perinatal outcomes at individual-level during all periods (antenatal care, delivery care, childbirth, and neonatal periods)	44
No available information on the system	21
Included	11
Not currently capturing data	9
Has no baseline data captures from the last 5 years	6
Not MNCH system	3
Not from LMICs	1
Paper only	1

## Sheet: MNCH systems
Data collection systems excluded
SOFTWARE/PLATFORM	MNCH Registry	COUNTRIES	INCLUDED/ EXCLUDED	REASONS for EXCLUSION	COMMENTS
Aden Cancer Registry- N, YEMEN	Aden Cancer Registry- N, YEMEN	Yemen	EXCLUDED	Does not continuously collect perinatal outcomes at individual-level during all periods (antenatal care, delivery care, childbirth, and neonatal periods)	Cancer registry
Ambulatório de Endocrinopatias na Gestação eletrônico (AMBEG), Brasil	Ambulatório de Endocrinopatias na Gestação eletrônico (AMBEG), Brasil	Brazil	EXCLUDED	Does not continuously collect perinatal outcomes at individual-level during all periods (antenatal care, delivery care, childbirth, and neonatal periods)	Endocrinopathy registry
Birth Defects Monitoring Network	Birth Defects Monitoring Network	China	EXCLUDED	Does not continuously collect perinatal outcomes at individual-level during all periods (antenatal care, delivery care, childbirth, and neonatal periods)	Birth defects surveillance system
Brazilian National Notification System for Sanitary Surveillance (NOTIVISA)	Brazilian National Notification System for Sanitary Surveillance (NOTIVISA)	Brazil	EXCLUDED	Does not continuously collect perinatal outcomes at individual-level during all periods (antenatal care, delivery care, childbirth, and neonatal periods)	Passive surveillance system of AEFV
Child Health and Mortality Prevention Surveillance (CHAMPS)	CHAMPS	Bangladesh; Ethiopia; Kenya; Mali; Mozambique; South Africa; Sierra Leone	EXCLUDED	Does not continuously collect perinatal outcomes at individual-level during all periods (antenatal care, delivery care, childbirth, and neonatal periods)	Facility and community based network of disease surveillance sites in Sub-Saharan Africa and South Asia gathering data about why children under 5 die. Pregnancy surveillance will be phased in at each site following formative research and piloting activities, starting in Kenya.
China’s National Maternal Near Miss Surveillance System	China’s National Maternal Near Miss Surveillance System	China	EXCLUDED	Does not continuously collect perinatal outcomes at individual-level during all periods (antenatal care, delivery care, childbirth, and neonatal periods)	Maternal Near Miss surveillance system
Clinic Master / Clinic Master Uganda	Clinic Master Uganda	Uganda	EXCLUDED	Does not continuously collect perinatal outcomes at individual-level during all periods (antenatal care, delivery care, childbirth, and neonatal periods)	Electronic medical record with unstructured data type and free text on pregnancy outcomes used in private clinics (Annettee Nakimuli).
Congenital Malformations Surveillance Program	Bogota Congenital Malformations Surveillance Program (BCMSP)	Colombia	EXCLUDED	Does not continuously collect perinatal outcomes at individual-level during all periods (antenatal care, delivery care, childbirth, and neonatal periods)	Birth defects surveillance system
Cuban Register of Congenital Malformation	Cuban Register of Congenital Malformation	Cuba	EXCLUDED	Does not continuously collect perinatal outcomes at individual-level during all periods (antenatal care, delivery care, childbirth, and neonatal periods)	Birth defects surveillance system
Directorate of Medical Records and Health Statistics of the Ministry of Public Health of Cuba (MINSAP)	Directorate of Medical Records and Health Statistics of the Ministry of Public Health of Cuba (MINSAP)	Cuba	EXCLUDED	Does not continuously collect perinatal outcomes at individual-level during all periods (antenatal care, delivery care, childbirth, and neonatal periods)	Health information system
District Health Information Software 2	The District Health Information Management System–2 (DHIMS–2) Database	Ghana	EXCLUDED	Does not continuously collect perinatal outcomes at individual-level during all periods (antenatal care, delivery care, childbirth, and neonatal periods)	Aggegated data.Does not collect individual patient-data but aggregate data. However, it would have the ability to collect prospective, longitudinal, and individual-level data.
District Health Information Software 2	Tanzania National Health Database	Tanzania	EXCLUDED	Does not continuously collect perinatal outcomes at individual-level during all periods (antenatal care, delivery care, childbirth, and neonatal periods)	Aggegated data.Does not collect individual patient-data but aggregate data. However, it would have the ability to collect prospective, longitudinal, and individual-level data.
Egyptian IVF registry - N	Egyptian IVF registry - N	Egypt	EXCLUDED	Does not continuously collect perinatal outcomes at individual-level during all periods (antenatal care, delivery care, childbirth, and neonatal periods)	In-vitro fertilization (IVF) registry
Electronic Immunisation Registry - Brazil	Electronic Immunisation Registry - Brazil	Brazil	EXCLUDED	Does not continuously collect perinatal outcomes at individual-level during all periods (antenatal care, delivery care, childbirth, and neonatal periods)	Passive surveillance system of AEFV. Does not collect data from all pregnant women and newborns. EIR has the possibility to implement active surveillance systems when the EIR is linked to electronic records (https://www.ncbi.nlm.nih.gov/pmc/articles/PMC5802648/#B5)
Guangdong Registry of Congenital Heart defects	Guangdong Registry of Congenital Heart defects	China	EXCLUDED	Does not continuously collect perinatal outcomes at individual-level during all periods (antenatal care, delivery care, childbirth, and neonatal periods)	Birth defects surveillance system
Guinea-Bissau Twin Registry-NI	Guinea-Bissau Twin Registry-NI	Guinea-Bissau	EXCLUDED	Does not continuously collect perinatal outcomes at individual-level during all periods (antenatal care, delivery care, childbirth, and neonatal periods)	Twin registry
INCLEN- SOMAARTH	INCLEN- SOMAARTH	India	EXCLUDED	Does not continuously collect perinatal outcomes at individual-level during all periods (antenatal care, delivery care, childbirth, and neonatal periods)	INCLEN has a system/software called SOMAARTH but it is not being used as a continuous perinatal data collection system. The system serves to cohort and cross sectional studies. It could be a potential system to use but regarding our inclusion criteria it would be not an existing system that is currently collecting perinatal data. They also have a Demographic surveillance study in 51 Villages from…
Kerala Registry for Epilepsy and Pregnancy	Kerala Registry for Epilepsy and Pregnancy	India	EXCLUDED	Does not continuously collect perinatal outcomes at individual-level during all periods (antenatal care, delivery care, childbirth, and neonatal periods)	Epilepsy during pregnancy registry
Korean Neonatal Network (KNN)	Korean Neonatal Network (KNN)	Republic of Korea	EXCLUDED	Does not continuously collect perinatal outcomes at individual-level during all periods (antenatal care, delivery care, childbirth, and neonatal periods)	VLBWIs prospective web-based registry
Malaysian National Neonatal Registry (MNNR)	Malaysian National Neonatal Registry (MNNR)	Malaysian	EXCLUDED	Does not continuously collect perinatal outcomes at individual-level during all periods (antenatal care, delivery care, childbirth, and neonatal periods)	Audit of critically ill babies admitted to a Neonatal Unit (NU)
Maternal and Perinatal Mortality Enhanced Surveillance System in Pakistan	Maternal and Perinatal Mortality Enhanced Surveillance System in Pakistan	Pakistan	EXCLUDED	Does not continuously collect perinatal outcomes at individual-level during all periods (antenatal care, delivery care, childbirth, and neonatal periods)	Maternal death surveillance system
Maternal mortality surveillance systems in China	Maternal mortality surveillance systems in China	China	EXCLUDED	Does not continuously collect perinatal outcomes at individual-level during all periods (antenatal care, delivery care, childbirth, and neonatal periods)	Maternal death surveillance system
Mexican Registry and Epidemiological Surveillance of External Congenital Malformations (RYVEMCE)	Mexican Registry and Epidemiological Surveillance of External Congenital Malformations (RYVEMCE)	Mexico	EXCLUDED	Does not continuously collect perinatal outcomes at individual-level during all periods (antenatal care, delivery care, childbirth, and neonatal periods)	Birth defects surveillance system
National Birth Registration Database KOREA	National Birth Registration Database KOREA	Republic of Korea	EXCLUDED	Does not continuously collect perinatal outcomes at individual-level during all periods (antenatal care, delivery care, childbirth, and neonatal periods)	Civil registration
National Eclampsia Registry (NER)	National Eclampsia Registry (NER	India	EXCLUDED	Does not continuously collect perinatal outcomes at individual-level during all periods (antenatal care, delivery care, childbirth, and neonatal periods)	Eclampia registry
National Maternal Mortality Surveillance System (NMMSS), IRAN	National Eclampsia Registry (NER	Iran	EXCLUDED	Does not continuously collect perinatal outcomes at individual-level during all periods (antenatal care, delivery care, childbirth, and neonatal periods)	Maternal death surveillance system
National Public Health Surveillance System (SIVIGILA) - Congenital Birth Defects Surveillance Programme	National Public Health Surveillance System (SIVIGILA) - Congenital Birth Defects Surveillance Programme	Colombia	EXCLUDED	Does not continuously collect perinatal outcomes at individual-level during all periods (antenatal care, delivery care, childbirth, and neonatal periods)	Birth defects surveillance system
Newborn and Birth Defects Database in SE Asia	Newborn and Birth Defects Database in SE Asia	South East Asia	EXCLUDED	Does not continuously collect perinatal outcomes at individual-level during all periods (antenatal care, delivery care, childbirth, and neonatal periods)	Birth defects surveillance system. Hospital-based surveillance. All live births and stillbirths born with a birth defect are registered
Only registration of Certificates of Live Births - N, PERU	Obstetric health information system -NI, Cameroon	Peru	EXCLUDED	Does not continuously collect perinatal outcomes at individual-level during all periods (antenatal care, delivery care, childbirth, and neonatal periods)	Civil registration
PAHO- SANEVA - Adverse Event Sentinel Surveillance Network for new vaccines	PAHO- SANEVA - Adverse Event Sentinel Surveillance Network for new vaccines	Argentina; Brazil; Mexico; Panama; Venezuela	EXCLUDED	Does not continuously collect perinatal outcomes at individual-level during all periods (antenatal care, delivery care, childbirth, and neonatal periods)	Passive surveillance system of AEFV. (https://www.sciencedirect.com/topics/nursing-and-health-professions/vaccine-adverse-event-reporting-system)
Perinatal and Neonatal National Epidemiological Surveillance Subsystem (PNNESS)	Perinatal and Neonatal National Epidemiological Surveillance Subsystem (PNNESS)	Peru	EXCLUDED	Does not continuously collect perinatal outcomes at individual-level during all periods (antenatal care, delivery care, childbirth, and neonatal periods)	Perinatal surveillance system
Registro Nacional de Anomalías Congénitas de Argentina (RENAC)	Registro Nacional de Anomalías Congénitas de Argentina (RENAC)	Argentina	EXCLUDED	Does not continuously collect perinatal outcomes at individual-level during all periods (antenatal care, delivery care, childbirth, and neonatal periods)	Birth defects surveillance system
Registry Center for Congenital Anomalies Costa Rica (CREC)	Registry Center for Congenital Anomalies Costa Rica (CREC)	Costa Rica	EXCLUDED	Does not continuously collect perinatal outcomes at individual-level during all periods (antenatal care, delivery care, childbirth, and neonatal periods)	Birth defects surveillance system
SINAIS MEXICO (Mexican Ministry of Health)	SINAIS MEXICO (Mexican Ministry of Health)	Mexico	EXCLUDED	Does not continuously collect perinatal outcomes at individual-level during all periods (antenatal care, delivery care, childbirth, and neonatal periods)	Health information system
SISPRO Colombia	SISPRO Colombia	Colombia	EXCLUDED	Does not continuously collect perinatal outcomes at individual-level during all periods (antenatal care, delivery care, childbirth, and neonatal periods)	Health information system
South African Perinatal Problems Identification Program (PPIP)	South African Perinatal Problems Identification Program (PPIP)	South Africa	EXCLUDED	Does not continuously collect perinatal outcomes at individual-level during all periods (antenatal care, delivery care, childbirth, and neonatal periods)	Perinatal death surveillance system
Tabriz Registry of Congenital Anomalies (TROCA)	Tabriz Registry of Congenital Anomalies (TROCA)	Iran	EXCLUDED	Does not continuously collect perinatal outcomes at individual-level during all periods (antenatal care, delivery care, childbirth, and neonatal periods)	Birth defects surveillance system
The Latin American Collaborative Study of Congenital Malformations	The Latin American Collaborative Study of Congenital Malformations	Chile; Argentina; Bolivia; Brazil; Perú; Venezuela; Colombia	EXCLUDED	Does not continuously collect perinatal outcomes at individual-level during all periods (antenatal care, delivery care, childbirth, and neonatal periods)	Birth defects surveillance system
Ukraine Birth Defects Program	Ukraine Birth Defects Program	Ukraine	EXCLUDED	Does not continuously collect perinatal outcomes at individual-level during all periods (antenatal care, delivery care, childbirth, and neonatal periods)	Birth defects surveillance system
UN Inter-agency Group for Child Mortality Estimation (UN IGME)	UN Inter-agency Group for Child Mortality Estimation (UN IGME)	Worldwide	EXCLUDED	Does not continuously collect perinatal outcomes at individual-level during all periods (antenatal care, delivery care, childbirth, and neonatal periods)	UN IGME updates child mortality estimates annually after reviewing newly available data and assessing data quality
Vaccine Adverse Events Information Monitoring System (VAEIMS)	Vaccine Adverse Events Information Monitoring System (VAEIMS)	India; Sri Lanka	EXCLUDED	Does not continuously collect perinatal outcomes at individual-level during all periods (antenatal care, delivery care, childbirth, and neonatal periods)	Passive surveillance system of AEFV
Zhejiang Immunization Information System (ZJIIS) - N	Zhejiang Immunization Information System (ZJIIS) - N	China	EXCLUDED	Does not continuously collect perinatal outcomes at individual-level during all periods (antenatal care, delivery care, childbirth, and neonatal periods)	Electronic immunization system that collect immunization data for children aged <7 years living in Zhejiang Province
District Health Information Software 2	Kenya Health information system	Kenya	EXCLUDED	Does not continuously collect perinatal outcomes at individual-level during all periods (antenatal care, delivery care, childbirth, and neonatal periods)	Aggegated data.Does not collect individual patient-data but aggregate data. However, it would have the ability to collect prospective, longitudinal, and individual-level data.
District Health Information Software 2	MomConnect/Provincial Health Data Centre (PHDC)	South Africa	EXCLUDED	Does not continuously collect perinatal outcomes at individual-level during all periods (antenatal care, delivery care, childbirth, and neonatal periods)	Mobile platform that provides pregnant and postpartum women with twice-weekly health information text messages as well as access to a helpdesk for patient queries and feedback.
CMC Vellore	CMC Vellore	India	EXCLUDED	Has no baseline data captures from the last 5 years	CMC Vellore is a Gates grantee that will be starting this up. (Lisa Noguchi)
HaSET / HaSET	HaSET India / HaSET Ethiopia	India; Ethiopia	EXCLUDED	Has no baseline data captures from the last 5 years	HaSET Ethiopia is a Gates grantee that will be starting this up . https://connects.catalyst.harvard.edu/Profiles/display/Person/40690. (Lisa Noguchi)
Jhpiego-led ASMAN progam	Jhpiego-led ASMAN progam	India	EXCLUDED	Has no baseline data captures from the last 5 years	The Jhpiego-led ASMAN program in India is collecting a range of MNH outcomes. Data collection is starting at the birth facility, so some ANC data may be retrospective and some MNH outcome data for intrapartum and PNC periods may be prospective for individual clients. (Lisa Noguchi) No more information could be obtained.
District Health Information Software 2	PMTCT Tracker	Zimbawe	EXCLUDED	Has no baseline data captures from the last 5 years	It is being implemented.The Prevention of Mother-to-Child Transmission (PMTCT) routine health information system developed in DHIS2 Tracker that is being piloted and implemented.
Pregnancy Exposure Registry & Birth Defects Surveillance - PER/BDS (National)	Pregnancy Exposure Registry & Birth Defects Surveillance - PER/BDS (National)	South Afrika	EXCLUDED	Has no baseline data captures from the last 5 years	It is being implemented. This project will use the PER model developed in the Western Cape to expand these existing Western Cape pregnancy registers, to establish electronic pregnancy and birth registers in both provinces. This will serve as a pilot towards scale-up and implementation of a South African National Department of Health Pregnancy Register.
Birth Registry at Kilimanjaro Christian Medical Center	Birth Registry at Kilimanjaro Christian Medical Center	Tanzania	EXCLUDED	No available information on the system
Brazilian National Health Information System DATASUS	Brazilian National Health Information System DATASUS	Brazil	EXCLUDED	No available information on the system
China Maternal and Child Health Surveillance System	China Maternal and Child Health Surveillance System	China	EXCLUDED	No available information on the system
Gongcheng Maternal, Newborn and Child Health Information System	Gongcheng Maternal, Newborn and Child Health Information System	China	EXCLUDED	No available information on the system
India’s Mother and Child Tracking System (MCTS)	India’s Mother and Child Tracking System (MCTS)	India	EXCLUDED	No available information on the system
Malaysian National Obstetrics Registry	Malaysian National Obstetrics Registry	Malaysian	EXCLUDED	No available information on the system
Maternal and Neonatal Healthcare Information System (SISMater)	Maternal and Neonatal Healthcare Information System (SISMater)	Brazil	EXCLUDED	No available information on the system
Maternal Infant Death Review System	Maternal Infant Death Review System	India	EXCLUDED	No available information on the system
Murmansk Regional Congenital Defects Registry	Murmansk Regional Congenital Defects Registry	Russia	EXCLUDED	No available information on the system
National Genetic Register (NGR) of the Republic of Kazakhstan (RK)	National Genetic Register (NGR) of the Republic of Kazakhstan (RK)	Kazakhstan	EXCLUDED	No available information on the system
District Health Information Software 2	AviCenna Health Information Medical System	Palestine	EXCLUDED	No available information on the system
Projahnmo-II Project - Pregnancy Registration - NI, Bangladesh	Projahnmo-II Project - Pregnancy Registration - NI, Bangladesh	Bangladesh	EXCLUDED	No available information on the system
Queen Sirikit National Institute of Child Health System	Queen Sirikit National Institute of Child Health (QSNICH) - Thailand Birth Defects Registry	Thailand	EXCLUDED	No available information on the system
SIMANH / SIMANH, Thailand System	SIMANH, Thailand System	Thailand	EXCLUDED	No available information on the system
Sistem Informasi Kesehatan Daerah (SIKDA)- NI, Indonesia	Sistem Informasi Kesehatan Daerah (SIKDA)- NI, Indonesia	Indonesia	EXCLUDED	No available information on the system
DynaSite	Zambia Electronic Perinatal Record System (ZEPRS)	Zambia	EXCLUDED	Has no baseline data captures from the last 5 years
The National Maternal and Child Health Routine Reporting System (NMCHRS), CHINA	The National Maternal and Child Health Routine Reporting System (NMCHRS), CHINA	China	EXCLUDED	No available information on the system	Maternal death surveillance. No available information on whether they continuously collect perinatal outcomes
The Pregnancy and Infant Cohort Monitoring and Evaluation (PICME) system.	The Pregnancy and Infant Cohort Monitoring and Evaluation (PICME) system.	India	EXCLUDED	No available information on the system
Tianjin Maternal and Child Health Information System	Tianjin Maternal and Child Health Information System	China	EXCLUDED	No available information on the system
WHO Pregnancy Registry of drug exposures	WHO Pregnancy Registry of drug exposures	International	EXCLUDED	No available information on the system
OpenMRS	AMPATH medical record system (AMRS)	Kenya	EXCLUDED	No available information on the system
Smartcare	Electronic Health Record System SmartCare-Ethiopia / Smart Care South Africa	Ethiopia	EXCLUDED	No available information on the system
A registry for the JiVitA 1 project - NI, Bangladesh	A registry for the JiVitA 1 project - NI, Bangladesh	Bangladesh	EXCLUDED	Not currently capturing data
Arkhangelsk County Birth Registry	Arkhangelsk County Birth Registry	Russia	EXCLUDED	Not currently capturing data
Brazilian Network for Surveillance of Severe Maternal Morbidity	Brazilian Network for Surveillance of Severe Maternal Morbidity	Brazil	EXCLUDED	Not currently capturing data
Kola Birth Registry	Kola Birth Registry	Russia	EXCLUDED	Not currently capturing data
Lamotrigine Pregnancy Registry	Lamotrigine Pregnancy Registry	International	EXCLUDED	Not currently capturing data
Millennium Villages Project information system- NI, Senegal	Millennium Villages Project information system- NI, Senegal	Senegal	EXCLUDED	Not currently capturing data
Murmansk County Birth Registry	Murmansk County Birth Registry	Russia	EXCLUDED	Not currently capturing data
Obstetric health information system -NI, Cameroon	Obstetric health information system -NI, Cameroon	Cameroon	EXCLUDED	Not currently capturing data
Quality of Prenatal & Maternal Care Clinical Decision Support (QUALMAT) - NI, "Burkina Faso, Ghana, Tanzania"	Quality of Prenatal & Maternal Care Clinical Decision Support (QUALMAT) - NI, "Burkina Faso, Ghana, Tanzania"	Burkina Faso; Ghana; Tanzania	EXCLUDED	Not currently capturing data
Latin American Registry (RLA) of assisted reprod. tech. - NI, CHILE	Latin American Registry (RLA) of assisted reprod. tech. - NI, CHILE	Chile	EXCLUDED	Not from LMICs
Colab - COLLECT Database	Colab	International	EXCLUDED	Not MNCH system	The COLLECT database is a platform through which investigators in the field of pregnancy research could collect data. (https://pregnancycolab.tghn.org/site_media/media/medialibrary/2018/10/2018_Myers_JE.pdf)
Maternal and perinatal death surveillance and response (MDSR)	Maternal and perinatal death surveillance and response	Kenya; Ghana; other	EXCLUDED	Not MNCH system	It is not an MNCH system. MDSR is a form of continuous surveillance linking the health information system and quality improvement processes from local to national levels. It includes the routine identification, notification, quantification, and determination of causes and avoidability of all maternal deaths, as well as the use of this information to respond with actions that will prevent future d…
Partnership for Maternal, Newborn and Child Health’ (PAMANECH)	PAMANECH	Nairobi-Kenya	EXCLUDED	Not MNCH system	It is not an MNCH system. It is a project to improve access to quality healthcare for mothers and children in Nairobi.
Chinese perinatal care monitoring data system	Chinese perinatal care monitoring data system	China	EXCLUDED	Paper only

## Sheet: Sheet1
No available information on the system
Not from LMICs
Does not continuously collect perinatal outcomes at individual-level during all periods (antenatal care, delivery care, childbirth, and neonatal periods)
Not MNCH system
Has no baseline data captures from the last 5 years
Not currently capturing data
Paper only
